# Supplementary material for: Charge complementary enzymatic reconfigurable polymeric nanostructures
Source: Royal Society of Chemistry journal article supplement (doi:10.1039/c2sm07460e), 2012-01-01
Supplement: c2sm07460e.pdf [file c2sm07460e.pdf]

## **Supporting Information**

### **Charge complementary enzymatic reconfigurable polymeric nanostructures**

**Pier-Francesco Caponi<sup>a</sup> and Rein V. Ulijn<sup>a</sup>**

<sup>a</sup> WestCHEM/Department of Pure and Applied Chemistry, University of Strathclyde, Glasgow, G11XL, Scotland, U.K.

**Materials** 2-isopropyl-2-oxazoline (iPrOx, Tokyo Chemical Industry) was stirred overnight with calcium hydride ( $\text{CaH}_2$ ), vacuum distilled and stored under nitrogen atmosphere. Alkaline phosphatase (New England BioLabs, 10,000 U/ml, one unit is defined as the amount of enzyme that hydrolyzes 1  $\mu\text{mol}$  of p-nitrophenylphosphate to p-nitrophenol in a total reaction volume of 1 ml at 37°C), propargyl p-toluensulfate (Fluka), 11-azido-3,6,9-trioxaundecan-1-amine (Aldrich), anhydrous N,N-dimethylformamide (DMF, Aldrich), *O*-(Benzotriazol-1-yl)-*N,N,N',N'*-tetramethyluronium hexafluorophosphate (HBTU, Aldrich), *N,N*-Diisopropylethylamine (DIPEA, Aldrich), 3.5 kDa regenerated cellulose membrane (Triple Red Ltd), 500 Da cellulose acetate membrane (Aldrich) anhydrous acetonitrile (AcN, Aldrich), tetrahydrofuran (THF, Aldrich), fluorenylmethoxyloxycarbonyl-phosphorylated tyrosine (Fmoc-*p*Y-OH) fluorenylmethoxyloxycarbonyl-lysine (tert-butyloxycarbonyl) (Fmoc-K(Boc)-OH) were used as received.

**Instrumentation** Fluorescence studies were performed on a Jasco FP-6500 spectrofluorometer. UV/Vis absorbance was measured on a Beckman Coulter DU 800 spectrophotometer equipped with a Beckman Coulter High Performance Temperature Controller. DLS was performed on an AVL/LSE-5004 light scattering electronics and multiple tau digital correlator using an angle of 90°. MALDI-TOF mass spectrometry was performed on a Kratos Analytical AXIIMA CFR using dithranol matrix. High performance liquid chromatography (HPLC) was carried out on a Dionex P680 HPLC system fitted with a UVD170U detector. An aliquot sample (100  $\mu\text{l}$ ) was injected into a Macherey-Nagel C18 column of the following dimensions: length 250 mm; internal diameter 4.6 mm; particle size 5  $\mu\text{m}$ ; flow rate 1 ml min<sup>-1</sup>. Atomic Force Microscopy (AFM) was performed on a Veeco Innova Scanning Probe Microscopy. The tip was a Phosphorous doped Si tapping mode tip and the instrument was operated in tapping mode. Images were processed using a 2D plane fit using the software included in the instrument.

### Polymer synthesis and characterization

**Polymerisation** Polymerisation of iPrOx was performed following a procedure reported in literature.<sup>16</sup> Microwave vials (2.0-5.0 mL) were left in a heating oven (125 °C) and cooled down to room temperature under nitrogen atmosphere. A solution containing 0.067 mmol of propargyl ptoluensulfate and 4 mmol of iPrOx was made directly in the microwave vial under nitrogen atmosphere and under stirring using AcN as the solvent. Total reaction volume was 3 ml. The vial was capped, and heated at 140 °C for 11 minutes. After the reaction, excess of H<sub>2</sub>O was added to the vial, and the solution was extensively dialyzed against water for 3 days. After dialysis the solution was freeze-dried.

**MALDI-TOF** The samples were prepared by mixing THF solution of the polymer and matrix (20 mg ml<sup>-1</sup>) in a ratio of 2:1 (v/v) (Fig S1).

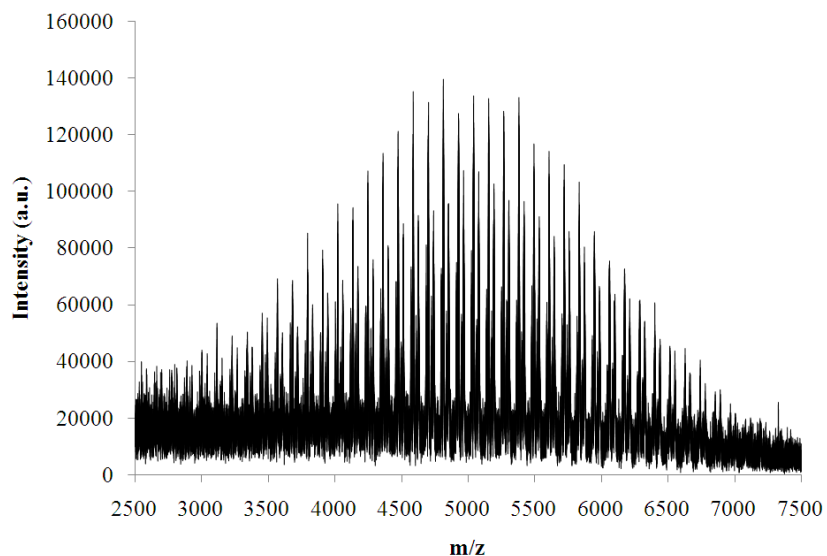

**Fig. S1.** MALDI-TOF mass spectrum of ST propargyl-PiPrOx-OH.

### Synthesis and characterisation of Fmoc-amino acids bearing terminal $N_3$

**Synthesis of azide functionalized Fmoc-amino acids** Synthesis of Fmoc-*p*Y bearing a terminal azide group was performed using a standard coupling procedure. The carboxylic terminus of Fmoc-*p*Y was activated using 2 eq. of HBTU and DIPEA in DMF/DCM (1:1). A solution containing 1 eq. of 11-azido-3,6, 9-trioxaundecan-1-amine **a** in DMF/DCM (1:1) was added to the activated the amino acid. The reaction was left overnight under rotation. Dialysis was performed with a membrane of regenerated cellulose (500 Da molecular weight cut off). Finally, the material was freeze dried. Synthesis of Fmoc-K(Boc)-OH bearing a terminal azide group was performed using the same coupling procedure detailed above. Removal of Boc protecting group was performed overnight using a solution of TFA/H<sub>2</sub>O (1:4 ratio). Solvents were removed using a vacuum pump.

**Characterisation** The purity of the obtained compounds was assessed by HPLC (initial flow rate 40% H<sub>2</sub>O, 60 % AcN) dissolving 0.2 mg of either Fmoc-*p*Y-OH (control) or Fmoc-*p*Y-N<sub>3</sub> in 1 ml of AcN/H<sub>2</sub>O (1:1 ratio) (Fig. S2) or Fmoc-K(Boc)-OH / Fmoc-K(Boc)-N<sub>3</sub> (Fig. S3). Purity of the final products was calculated to be 93% and 87% for Fmoc-*p*Y-N<sub>3</sub> and Fmoc-K(Boc)-N<sub>3</sub>, respectively.

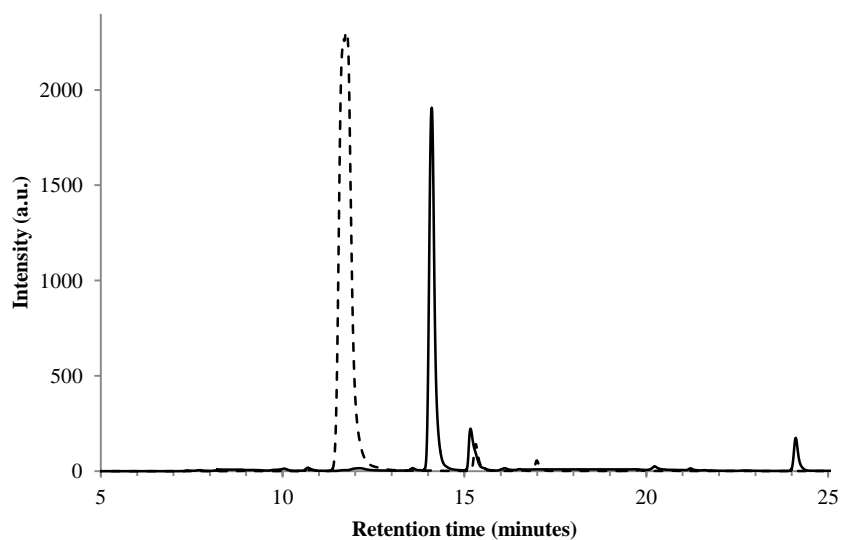

**Figure S2.** HPLC chromatogram obtained at 300 nm showing Fmoc-*p*Y (dotted line) and Fmoc-*p*Y-N<sub>3</sub> (continuous line) as the main peaks.

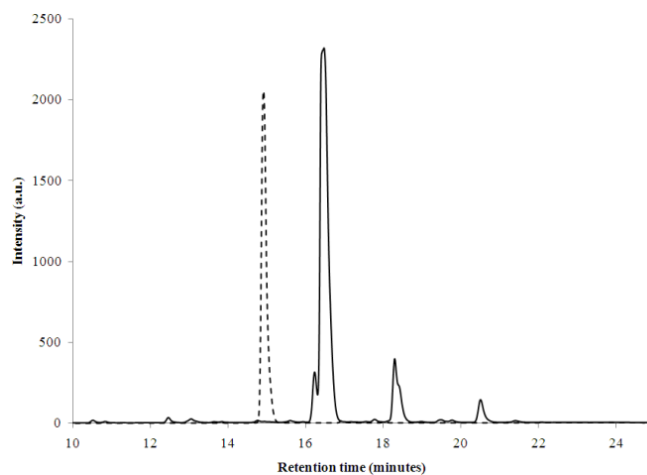

**Figure S3.** HPLC chromatogram obtained at 300 nm, showing Fmoc-K(Boc)-OH (dotted line) and Fmoc-K(Boc)-N<sub>3</sub> (continuous line) retention time.

After deprotection the Fmoc-K-N<sub>3</sub> was analyzed through MS to check the reaction was successful (Fig. S4).

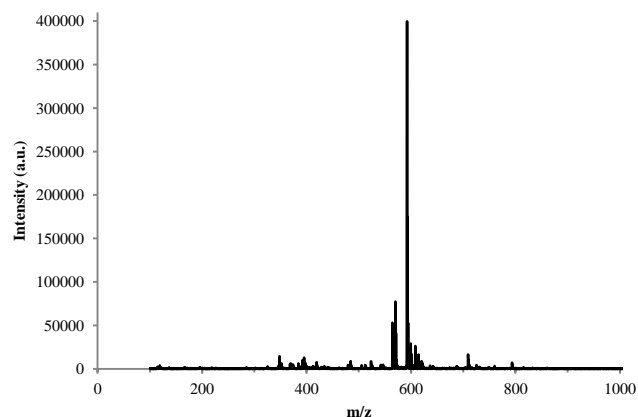

**Figure S4.** MS showing molecular weight profile of purified Fmoc-K-N<sub>3</sub> complex. The main peak has a value of 592, corresponding to the sodium adduct of Fmoc-K-N<sub>3</sub> (Mw=569).

### “Click” coupling of Fmoc-amino acid azide and polymer

**“Click” reaction** (Scheme 1) was performed in water, using CuSO<sub>4</sub> as catalyst and ascorbic acid as reducing agent in a ratio propargyl group/azide group/ CuSO<sub>4</sub> 1:2:0.3. 2 eq. of azide and 0.3 eq. of CuSO<sub>4</sub> and ascorbic acid were dissolved in a solution containing the polymer in water (final volume 7 ml). The reaction was left overnight on the rotator, before purification by dialysis, using a membrane with a molecular weight cut off of 3.5 kDa and freeze drying.

**Fmoc loading quantification** The freeze-dried polymer was used to evaluate the Fmoc loading by UV absorbance of Fmoc at 300 nm, comparing it with the concentration/absorbance dependence of a calibration curve. Calibration curves were obtained for each Fmoc-amino acid by measuring the absorbance values of Fmoc-*p*Y and Fmoc-K dissolved in H<sub>2</sub>O, at different concentrations. A known amount of polymer (~0.5-1.0 mg) was dissolved in 1 ml of water. The obtained absorbance at 300 nm was used to evaluate the concentration of Fmoc.

### UV/Vis experiments

**LCST** A thermostatic cell in the UV was used to evaluate the cloud point temperature of the polymers. The absorbance of a known concentration of polymer dissolved in water (1 mg/ml) was read at 600 nm, in order to have no absorbance at room temperature. The sample was heated in the thermostatic cell with intervals of 0.2°C, within a temperature range of 25-60°C. The absorbance started to increase when the phase transition temperature of the polymer was reached and transmittance values plotted into a graph.

### AFM experiments

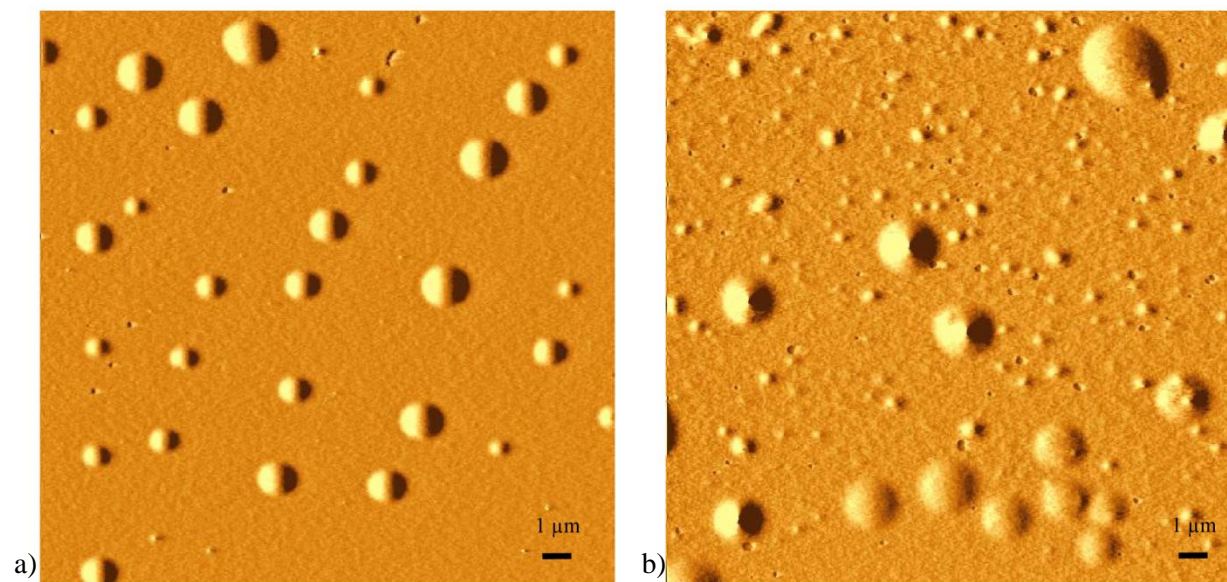

**Figure S5.** AFM images showing aggregates formed by Fmoc-pY-PiPrOx + Fmoc-pY-PiPrOx prior (a) and after (b) enzyme addition.

### Fluorescence experiments

Aqueous solution, containing a known amount of polymers (<0.01 mg), was used to take the initial measurement. The solution was left to incubate and measurements were taken every 12 hours. When the fluorescence spectrum did not show further changes, 50 U of phosphatase (5  $\mu$ L) was then added directly to the fluorimeter cuvette and changes in fluorescence spectra recorded. Used excitation wavelength 290 nm, emission range 295-500 nm, band width (Ex) 3 nm, band width (Em) 3 nm.

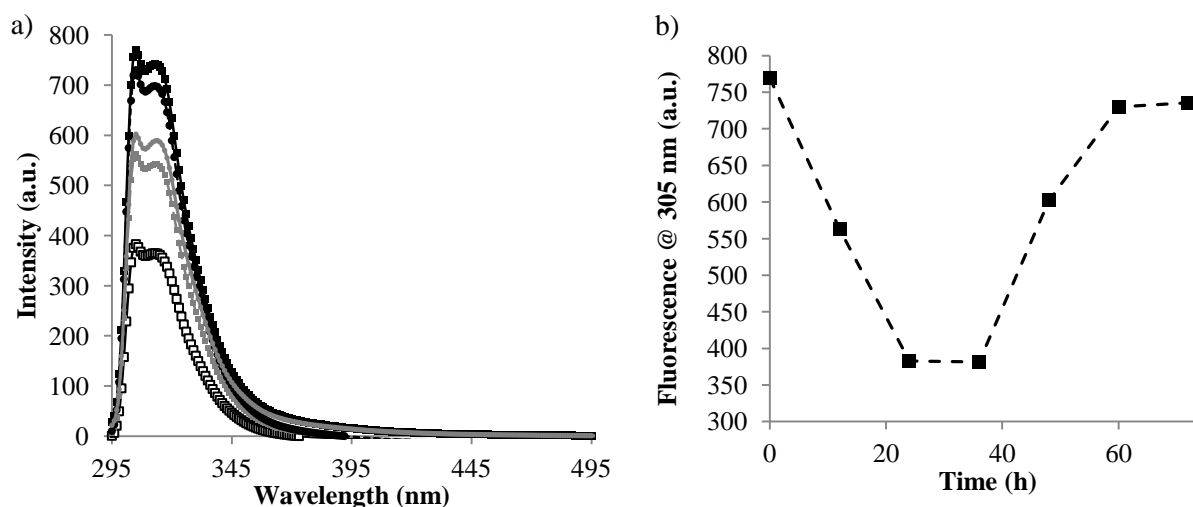

**Figure S6.** Fmoc-pY-PiPrOx + Fmoc-K-PiProx self-assembly kinetics followed by fluorescence exploiting the Fmoc peak at 305 nm. a) Dissolution of the polymers (■), 12 hours incubation (■), 24 hours incubation, enzyme addition (□), 12 hours after enzyme addition (●), 24 hours after enzyme addition (●); b) Fmoc intensity @ 305 nm plotted against time.

### DLS measurements

Aqueous solutions of polymer (2.5 mg/ml) were used to determinate the average particle sizes before and after the enzymatic reaction. Prior to the addition in the light scattering vial, the solution was filtered (PDV 0.2  $\mu\text{m}$  filter) to eliminate impurities. After taking a first measurement, 50 U of phosphatase (5  $\mu\text{L}$ ) was added directly to the vial and the sample was left overnight at room temperature, before taking a second measurement standing for the average particle size after the enzymatic conversion. Each measurement was repeated 3 times to ensure reproducibility.

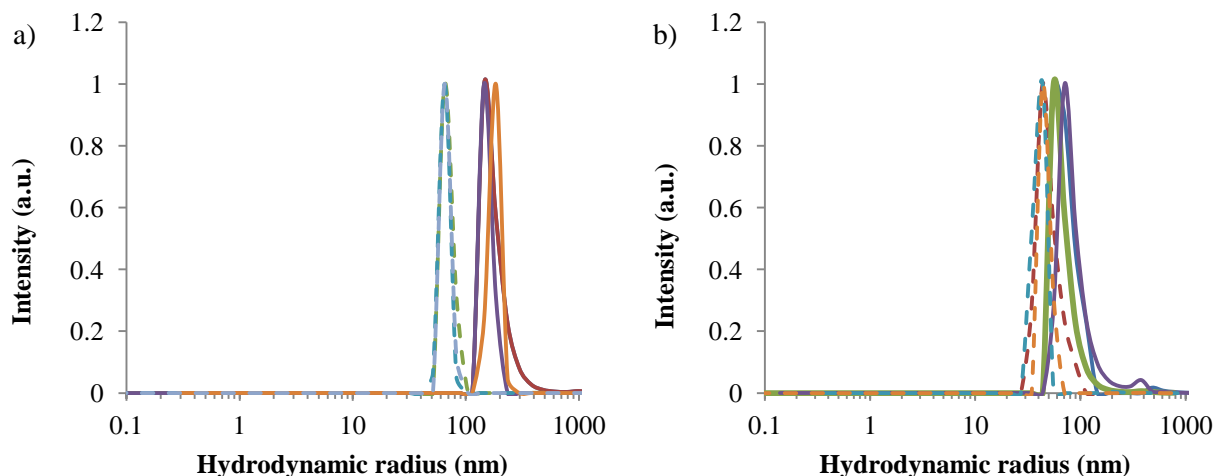

**Fig. S7.** DLS data for 1+3 (a) and 2+3 (b). Dotted lines show hydrodynamic radii above the LCST while continuous line below the LCST.
